# Supplementary material
Source: Springer Nature journal article supplement (https://www.springermedizin.de/resource/supplementary/12871_2003_10_MOESM1_ESM.pdf/9429448)
Supplement: MOESM1 [file 9429448]

Details of included studies

| Reference                | Design                                                                                                                                                                                                                                                                                                 | Dose, route and patients                                                                                                                                                                                                                                                | Outcomes                                                                                                                                                                                                                  | Analgesic results                                                                                                                                                                                                                                                                                                                                                                                                                                                                                                                                                                                                                                                                                                                           | Withdrawals and adverse events                                                                                                                                                                                                                                                                                                                                                                                                                                                                                                                                                                                    | Quality score                      |
|--------------------------|--------------------------------------------------------------------------------------------------------------------------------------------------------------------------------------------------------------------------------------------------------------------------------------------------------|-------------------------------------------------------------------------------------------------------------------------------------------------------------------------------------------------------------------------------------------------------------------------|---------------------------------------------------------------------------------------------------------------------------------------------------------------------------------------------------------------------------|---------------------------------------------------------------------------------------------------------------------------------------------------------------------------------------------------------------------------------------------------------------------------------------------------------------------------------------------------------------------------------------------------------------------------------------------------------------------------------------------------------------------------------------------------------------------------------------------------------------------------------------------------------------------------------------------------------------------------------------------|-------------------------------------------------------------------------------------------------------------------------------------------------------------------------------------------------------------------------------------------------------------------------------------------------------------------------------------------------------------------------------------------------------------------------------------------------------------------------------------------------------------------------------------------------------------------------------------------------------------------|------------------------------------|
| <b>Valdecoxib trials</b> |                                                                                                                                                                                                                                                                                                        |                                                                                                                                                                                                                                                                         |                                                                                                                                                                                                                           |                                                                                                                                                                                                                                                                                                                                                                                                                                                                                                                                                                                                                                                                                                                                             |                                                                                                                                                                                                                                                                                                                                                                                                                                                                                                                                                                                                                   |                                    |
| Fricke et al 2002        | <b>Randomised, double blind placebo and active controlled trial in post third molar surgery pain</b> (extraction of impacted third molars). Medication administered when baseline pain reached moderate or severe intensity.                                                                           | Placebo n=41<br>Valdecoxib 40 mg n=80<br>Rofecoxib 50 mg n=82                                                                                                                                                                                                           | PI CAT 4 pt scale (standard)<br>PR CAT 5 pt scale (standard)<br>Global 4 pt scale (nonstandard)<br>Time to perceptible relief<br>Time to meaningful relief<br>Time to remediation                                         | No of patients with at least 50% pain relief over 4 to 6 hours:<br>Placebo 2/41<br>Valdecoxib 40 mg 42/80<br>Rofecoxib 50 mg 40/82<br><br>Remediation - data not useable. Patients permitted a second valdecoxib 40 mg dose before being classified as re-medicated. Patients in comparator groups moved straight to rescue medication. Unclear from report how many patients received the extra valdecoxib dose (statement of numbers in valdecoxib group not re-medicated contradictory - 36% or 65%?)                                                                                                                                                                                                                                    | One patient was withdrawn for protocol noncompliance.<br><br>Pcb Valde 40 mg Rofe 50 mg<br>Any event 21(51%) 36(45%) 39(48%)<br>Headache 13(32%) 10(12%) 12(15%)<br>Nausea 2(5%) 14(17%) 12(15%)<br>Vomiting 3(7%) 8(10%) 7(8%)<br>Alveolitis 4(9.8%) 13(16.3%) 23(28)                                                                                                                                                                                                                                                                                                                                            | R =1<br>DB =1<br>WD =1<br>Total =3 |
| Daniels et al 2002       | <b>Randomised, double blind placebo and active controlled trials in post third molar surgery pain</b> (extraction of impacted third molars). Medication administered when baseline pain reached moderate or severe intensity.                                                                          | <b>Study 1</b><br>Placebo n=52<br>Valdecoxib 20 mg n=52<br>Valdecoxib 40 mg n=50<br>Oxycodone 10 mg<br>paracetamol 1000 mg n=51<br><br><b>Study 2</b><br>Placebo n=51<br>Valdecoxib 20 mg n=49<br>Valdecoxib 40 mg n=50<br>Oxycodone 10 mg<br>+paracetamol 1000 mg n=51 | PI CAT 4 pt scale (standard)<br>PR CAT 5 pt scale (standard)<br>Global 4 pt scale (nonstandard)<br>Time to onset of analgesia<br>Time to perceptible relief<br>Time to meaningful relief<br>Time to remediation           | <b>Study 1</b><br>Placebo 5/52<br>Valdecoxib 20 mg 31/52<br>Valdecoxib 40 mg 42/50<br><br>Median time to remediation<br>Placebo 1hr 5 mins<br>Valdecoxib 20 mg >24 hrs<br>Valdecoxib 40 mg >24 hrs<br>Oxy/par 11 hrs 17 mins<br><br>Number of patients re-medicated<br>Placebo 44(85%)<br>Valdecoxib 20 mg 24(46%)<br>Valdecoxib 40 mg 12(24%)<br>Oxy/par 28(55%)<br><br><b>Study 2</b><br>Placebo 3/51<br>Valdecoxib 20 mg 38/49<br>Valdecoxib 40 mg 37/50<br><br>Median time to remediation<br>Placebo 4 mins<br>Valdecoxib 20 mg 10 hrs 58 mins<br>Valdecoxib 40 mg >24 hrs<br>Oxy/par 6 hrs 4 mins<br><br>Number of patients re-medicated<br>Placebo 46(90%)<br>Valdecoxib 20 mg 28(57%)<br>Valdecoxib 40 mg 22(44%)<br>Oxy/par 40(78%) | No patients were excluded or discontinued. Adverse events analysis pooled across both studies.<br><br>Pcb Valde 20 mg Valde 40 mg Oxy/par<br>Any event 55(53%) 36(36%) 27(27%) 71(70%)<br>Headache 23(22%) 11(11%) 8(8%) 19(19%)<br>Nausea 28(27%) 7(7%) 7(7%) 33(32%)<br>Vomiting 12(12%) 4(4%) 4(4%) 23(23%)                                                                                                                                                                                                                                                                                                    | R =2<br>DB =2<br>WD =1<br>Total =5 |
| Christensen et al 2002   | <b>Randomised, double blind placebo and active controlled trials in post third molar surgery pain</b> (extraction of impacted third molars). Medication administered when baseline pain reached moderate or severe intensity.                                                                          | Placebo n=50<br>Valdecoxib 40 mg n=99<br>Rofecoxib 50 mg n=101                                                                                                                                                                                                          | PR CAT 5 pt scale (assumed to be standard as y axis of corresponding graph from 0 to 4)<br>Time to onset of analgesia<br>Time to remediation                                                                              | Placebo 1hr 4 mins<br>Valdecoxib 40 mg >24 hrs<br>Rofecoxib 50 mg >24 hrs<br><br>Median time to remediation<br>Placebo 2 hrs 10 mins<br>Valdecoxib 40 mg >24 hrs<br>Rofecoxib 50 mg >24 hrs<br><br>Number of patients re-medicated<br>Placebo 72%<br>Valdecoxib 40 mg 17%<br>Rofecoxib 50 mg 9%                                                                                                                                                                                                                                                                                                                                                                                                                                             | No useful adverse event data provided.                                                                                                                                                                                                                                                                                                                                                                                                                                                                                                                                                                            | R =2<br>DB =0<br>WD =0<br>Total =2 |
| <b>Parecoxib trials</b>  |                                                                                                                                                                                                                                                                                                        |                                                                                                                                                                                                                                                                         |                                                                                                                                                                                                                           |                                                                                                                                                                                                                                                                                                                                                                                                                                                                                                                                                                                                                                                                                                                                             |                                                                                                                                                                                                                                                                                                                                                                                                                                                                                                                                                                                                                   |                                    |
| Daniels et al 2001.      | <b>Randomised, double blind placebo and active controlled trial in post orthopedic knee surgery pain</b> (unilateral knee replacement surgery). Medication administered when pain reached moderate or severe intensity.                                                                                | Placebo n=51<br>Parecoxib 20 mg IV n= 50<br>Parecoxib 40 mg IM n= 51<br>Parecoxib 40 mg IM n= 50<br>Ketorolac 60 mg IM n= 51                                                                                                                                            | PI CAT 4 pt scale (standard)<br>PI VAS<br>PR CAT 5 pt scale (standard)<br>Global 4 pt scale (nonstandard)<br>Time to perceptible relief<br>Time to meaningful relief<br>Time to remediation                               | No of patients with at least 50% pain relief over 4 to 6 hours:<br>Placebo 18/51<br>Parecoxib 20 mg IV 30/50<br>Parecoxib 20 mg IM 32/51<br>Parecoxib 40 mg IM 36/51<br>Parecoxib 40 mg IM 39/50<br><br>Median time to remediation<br>Placebo 1.03 (1.02 to 1.26)<br>Parecoxib 20 mg IV 7.03 (6.03 to 9.5)<br>Parecoxib 20 mg IM 9.2 (6.4 to 10.1)<br>Parecoxib 40 mg IV 15.4 (11.1 to >24)<br>Parecoxib 40 mg IM 21.4 (10.1 to >24)<br>Ketorolac 60 mg IM 11.01(9.3 to 12.6)                                                                                                                                                                                                                                                               | One patient was withdrawn for protocol noncompliance.<br><br>Pcb Pare IV 20 Pare IM 20<br>Any event 18 (35%) 21 (42%) 14 (27%)<br>Headache 6 (12%) 3 (6%) 4 (8%)<br>Nausea 5 (10%) 5 (10%) 4 (8%)<br>Vomiting 1 (2%) 1 (2%) 1 (2%)<br>Alveolitis 3(6%) 6(12%) 5(10%)                                                                                                                                                                                                                                                                                                                                              | R =2<br>DB =2<br>WD =1<br>Total =5 |
| Rasmussen et al 2002     | <b>Randomised, double blind placebo and active controlled study in post orthopedic knee surgery pain</b> (unilateral knee replacement surgery). Medication administered when pain reached moderate or severe intensity.                                                                                | Placebo n=39<br>Parecoxib 20 mg IV n= 43<br>Ketorolac 30 mg IM n=42<br>Morphine 4 mg n= 42                                                                                                                                                                              | PI CAT 4 pt scale (standard)<br>PI VAS<br>PR CAT 5 pt scale (standard)<br>Global 4 pt scale (nonstandard)<br>Time to perceptible relief<br>Time to meaningful relief<br>Time to remediation                               | No of patients with at least 50% pain relief over 4 to 6 hours:<br>Placebo 7/39<br>Parecoxib 20 mg IV 14/43<br>Parecoxib 40 mg IV 21/42<br><br>Median time to remediation<br>Placebo 1.48 (1.24 to 2.40)<br>Parecoxib 20 mg IV 3.09 (2.11 to 3.40)<br>Parecoxib 40 mg IV 5.10 (3.45 to 6.55)<br>Ketorolac 30 mg IV 4.4 (3.3 to 6.2)<br>Morphine 4 mg IV 2.1 (1.5 to 2.6)                                                                                                                                                                                                                                                                                                                                                                    | One patient withdrew due to adverse events, five patients failed to comply following study drug administration, five patients were withdrawn for protocol violation and one patient received the wrong dose of parecoxib.<br><br>Pcb Pare 20 Pare 40<br>Any event 24 (62%) 31 (72%) 25 (60%)<br>Headache 2 (5%) 4 (9%) 2 (5%)<br>Nausea 10 (26%) 14 (33%) 10 (24%)<br>Vomiting 5 (13%) 9 (21%) 3 (7%)                                                                                                                                                                                                             | R =2<br>DB =1<br>WD =1<br>Total =4 |
| Barton et al 2002        | <b>Randomised, double blind placebo and active controlled study in post gynecologic laparotomy surgery pain</b> (total abdominal hysterectomy or myomectomy). Medication administered when pain reached > 45 mm (VAS) within 6 hours of pca discontinuation.                                           | Placebo n=42<br>Parecoxib 20 mg IV n= 39<br>Parecoxib 40 mg IV n= 38<br>Ketorolac 30 mg IV n= 41<br>Morphine 4 mg IV n= 42                                                                                                                                              | PI CAT 4 pt scale (standard)<br>PI VAS<br>PR CAT 5 pt scale (standard)<br>Global 4 pt scale (nonstandard)<br>Time to onset of analgesia<br>Time to perceptible relief<br>Time to meaningful relief<br>Time to remediation | No of patients with at least 50% pain relief over 4 to 6 hours:<br>Placebo 15/42<br>Parecoxib 20 mg 19/39<br>Parecoxib 40 mg 20/38<br><br>Median time to remediation<br>Placebo 1.50 (1.40 to 3.05)<br>Parecoxib 20 mg 6:10 (3.54 to 7.58)<br>Parecoxib 40 mg 6:30 (4.35 to 9.19)<br>Ketorolac 30 mg IV 6:0 (5.2 to 7.5)<br>Morphine 4 mg IV 2.4 (2.1 to 4.1)                                                                                                                                                                                                                                                                                                                                                                               | Three placebo patients withdrew before completing the 1 hour assessment, one patient from the parecoxib 20 mg group was withdrawn for protocol violation.<br><br>Two patients from the morphine group were withdrawn due to severe adverse events, 20 patients withdrew as a result of adverse events (45 from each experimental group and 2 from placebo group).Headache and fever were the most common reasons for withdrawal.<br><br>Pcb Pare 20 Pare 40<br>Any event 31 (74%) 34 (87%) 32 (84%)<br>Headache 9 (21%) 8 (21%) 10 (26%)<br>Nausea 16 (38%) 13 (33%) 12 (32%)<br>Vomiting 5 (12%) 6 (15%) 9 (24%) | R =2<br>DB =1<br>WD =1<br>Total =4 |
| Bikhazi et al 2001       | <b>Randomised, double blind placebo and active controlled single and multiple dose study in post-gynecologic laparotomy surgery pain</b> (total abdominal hysterectomy or myomectomy). Medication administered when pain reached > 45 mm (VAS) within 6 hours of pca morphine/pendine discontinuation. | Placebo n=44<br>Parecoxib 20 mg IV n= 38<br>Parecoxib 40 mg IV n= 42<br>Ketorolac 30 mg IV n= 38<br>Morphine 4 mg IV n= 41                                                                                                                                              | PI VAS (100 mm)<br>PR 5 pt scale (standard)<br>Global 4 pt scale (nonstandard)<br>Time to onset of analgesia<br>Time to remediation                                                                                       | No of patients with at least 50% pain relief over 4 to 6 hours:<br>Placebo 15/44<br>Parecoxib 20 mg IV 22/38<br>Parecoxib 40 mg IV 32/42<br><br>Median time to remediation<br>Placebo 2:50 (1.41 to 4.29)<br>Parecoxib 20 mg IV 6:05 (4.05 to 6:12)<br>Parecoxib 40 mg IV 6:00 (6.00 to 7:50)<br>Ketorolac 30 mg IV 6:1 (6.0 to 8:0)<br>Morphine 4 mg IV 4:6 (3.3 to 6.1)                                                                                                                                                                                                                                                                                                                                                                   | Four patients withdrew before completing the 1 hour assessment, 1 patient did not reach an adequate baseline pain level.<br><br>The most frequently reported adverse events were nausea/vomiting, headache, abdominal pain and flatulence. Highest incidence of adverse events reported by the morphine group where 85% of patients experienced an adverse event compared to 45 to 58% in the other treatment groups.                                                                                                                                                                                             | R =1<br>DB =1<br>WD =1<br>Total =3 |
